# Supplementary material for: Enhanced electrocatalytic ethanol oxidation reaction in alkaline media over Pt on a 2D BiVO4-modified electrode under visible light irradiation
Source: Royal Society of Chemistry journal article supplement (doi:10.1039/c8cy00864g), 2018-01-01
Supplement: c8cy00864g1.pdf [file c8cy00864g1.pdf]

## Electronic supplementary information

### Enhanced electrocatalytic ethanol oxidation reaction in alkaline media over Pt on 2D BiVO<sub>4</sub> modified electrode under visible light irradiation

Jiayue Hu <sup>a</sup>, Chunyang Zhai <sup>a,\*</sup>, Lixi Zeng <sup>b</sup>, Yukou Du,<sup>c</sup> and Mingshan Zhu <sup>a,b,\*</sup>

<sup>a</sup> School of Materials Science and Chemical Engineering, Ningbo University, Ningbo  
315211, P.R. China

<sup>b</sup> Guangdong Key Laboratory of Environmental Pollution and Health, School of  
Environment, Jinan University, Guangzhou 510632, P.R. China

<sup>c</sup> College of Chemistry, Chemical Engineering and Materials Science, Soochow  
University, Suzhou 215123, P. R. China

Email: [mingshanzhu@yahoo.com](mailto:mingshanzhu@yahoo.com) (M.Z); [zhaichunyang@nbu.edu.cn](mailto:zhaichunyang@nbu.edu.cn) (C.Z)

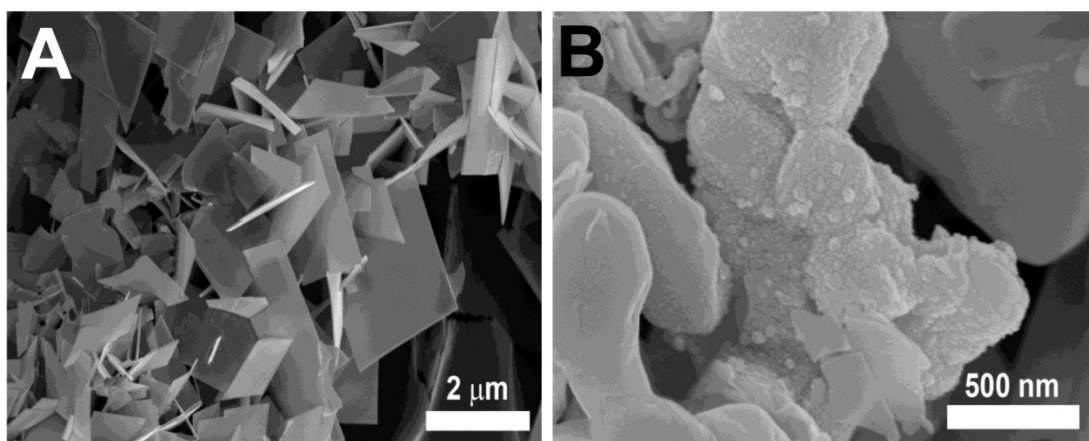

**Fig. S1.** SEM images of BiVO<sub>4</sub> (A) and Pt-BiVO<sub>4</sub> (B).

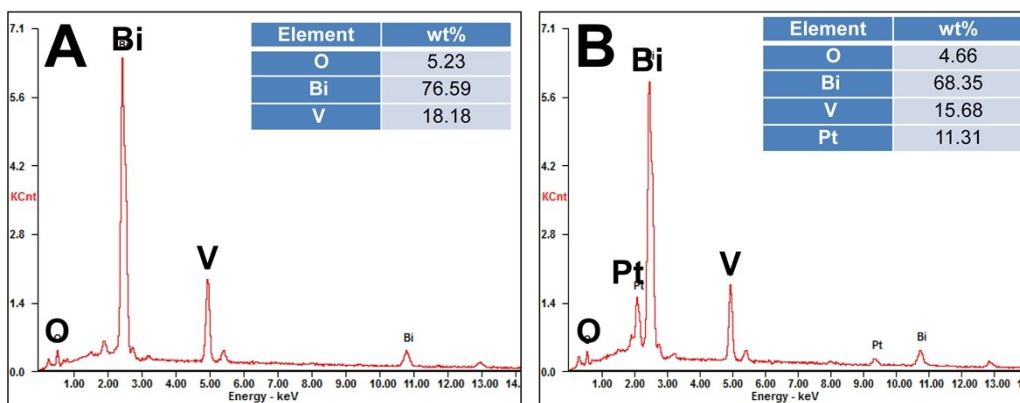

**Fig. S2.** EDX spectra of BiVO<sub>4</sub> (A) and Pt-BiVO<sub>4</sub> (B).

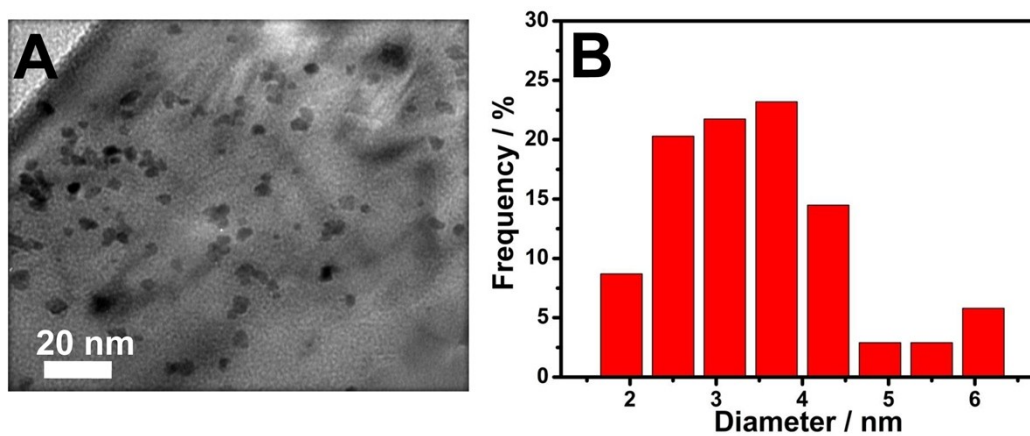

**Fig. S3.** TEM image (A) and the size distribution of Pt NPs in Pt-BiVO<sub>4</sub> nanocomposites (B).

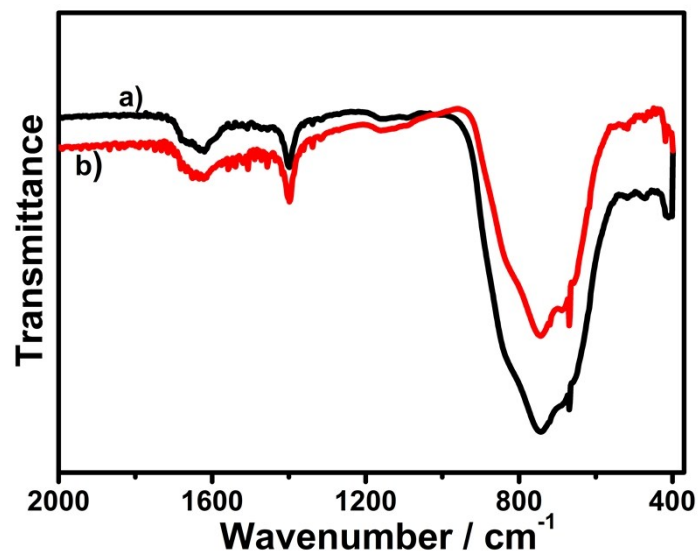

**Fig. S4.** FT-IR spectra of  $\text{BiVO}_4$  (a) and  $\text{Pt-BiVO}_4$  (b).

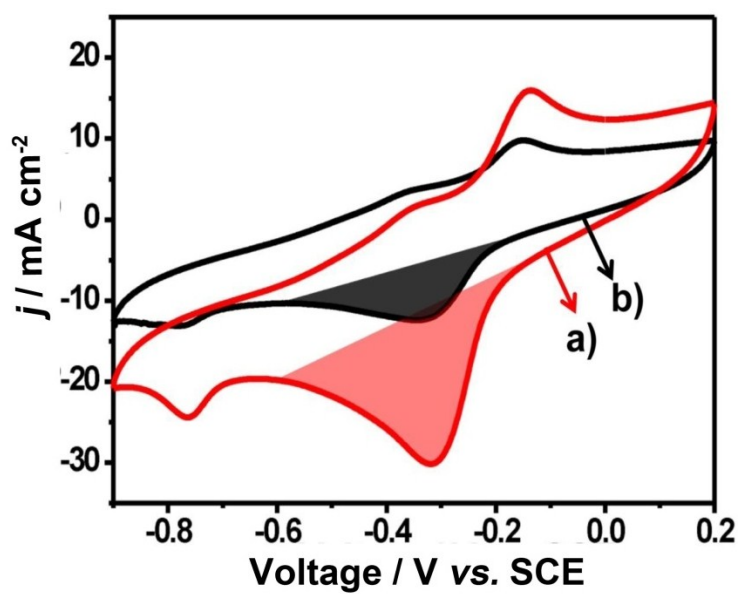

**Fig. S5.** CVs of  $\text{Pt-BiVO}_4$  in 1.0 M KOH solution under visible light irradiation (a) and dark condition (b) at a scan rate of  $50 \text{ mV s}^{-1}$ .

**Table S1.** EDX analysis of elementals content of BiVO<sub>4</sub> and Pt-BiVO<sub>4</sub>.

| Element | EDX (wt%)         |                      |
|---------|-------------------|----------------------|
|         | BiVO <sub>4</sub> | Pt-BiVO <sub>4</sub> |
| Bi      | 76.59 %           | 68.35 %              |
| O       | 5.23 %            | 4.66%                |
| V       | 18.18 %           | 15.68 %              |
| Pt      |                   | 11.31 %              |

**Table S2.** Recent reports on electrocatalytic activity of ethanol oxidation with different catalysts.

| Catalyst                                                 | Ethanol oxidation activity                                            |                                                                      | Reference                                  |
|----------------------------------------------------------|-----------------------------------------------------------------------|----------------------------------------------------------------------|--------------------------------------------|
| Pt-tantalum carbide                                      | 1.2 mA cm <sup>-2</sup>                                               |                                                                      | Appl Catal B: Environ 2018; 234:329-336    |
| PtCoFe                                                   | 4.75 mA cm <sup>-2</sup>                                              |                                                                      | Small 2017; 3:1700250                      |
| Pt <sub>1</sub> Mo <sub>1</sub> /C                       | 1000 mA mg <sup>-1</sup> <sub>Pt</sub>                                |                                                                      | Appl Catal B: Environ 2017; 203:654-662    |
| Ni@Pt/C                                                  | 14.30 mA cm <sup>-2</sup>                                             |                                                                      | Electrochim Acta 2017; 242:187-201         |
| PtCu                                                     | 19.3 mA cm <sup>-2</sup>                                              |                                                                      | Nanoscale 2017; 9: 2963–2968               |
| Pt–NiO <sub>x</sub>                                      | 1.68 mA cm <sup>-2</sup>                                              |                                                                      | RSC Adv 2018; 8: 698–705                   |
| Pt <sub>1</sub> Ru <sub>0.5</sub> Sn <sub>0.5</sub> -RGO | 1517 mA mg <sup>-1</sup> <sub>Pt</sub>                                |                                                                      | J Colloid Interface Sci 2017; 506: 135-143 |
| Pt <sub>x</sub> /Ni@C <sub>N</sub> -doped                | 273 mA mg <sup>-1</sup> <sub>Pt</sub>                                 |                                                                      | J Colloid Interface Sci 2018; 524:360-367  |
| PtPd NPs                                                 | 471.3 mA mg <sup>-1</sup> <sub>Pt</sub>                               |                                                                      | Nano Res 2017; 10: 1064-1077               |
| Pt-BiVO <sub>4</sub>                                     | dark                                                                  | visible light                                                        | This work                                  |
|                                                          | 591.3 mA mg <sup>-1</sup> <sub>Pt</sub> ;<br>8.45 mA cm <sup>-2</sup> | 1555 mA mg <sup>-1</sup> <sub>Pt</sub> ;<br>22.2 mA cm <sup>-2</sup> |                                            |
